# Supplementary material for: Lower IgG somatic hypermutation rates during acute dengue virus infection is compatible with a germinal center-independent B cell response
Source: PubMed Central journal article supplement (PMC4766701; doi:10.1186/s13073-016-0276-1), 2016-02-25
Supplement: 13073_2016_276_MOESM2_ESM.pdf [file 13073_2016_276_MOESM2_ESM.pdf]

# High throughput sequencing

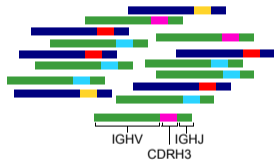

## Relative Transcription

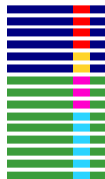

\* Same IGHV

# ImmuneDiversity

## Clonotypes n=4

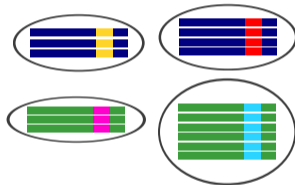

\* Same IGHV-IGHJ  
\* "Identical" CDRH3

## Lineages n=6

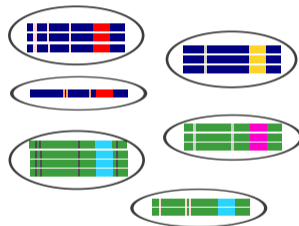

\* Same clonotype  
\* Different SHM pattern
