# Supplementary material for: Lower IgG somatic hypermutation rates during acute dengue virus infection is compatible with a germinal center-independent B cell response
Source: PubMed Central journal article supplement (PMC4766701; doi:10.1186/s13073-016-0276-1), 2016-02-25

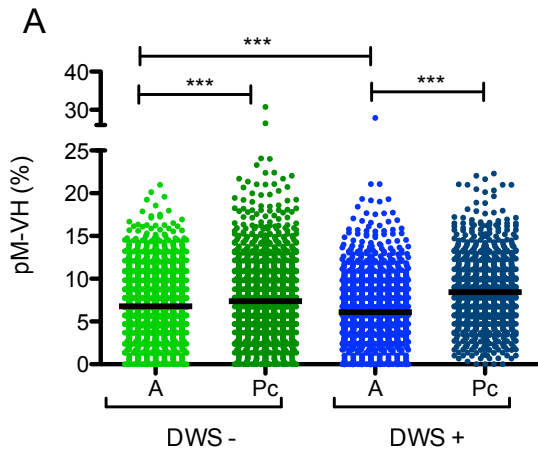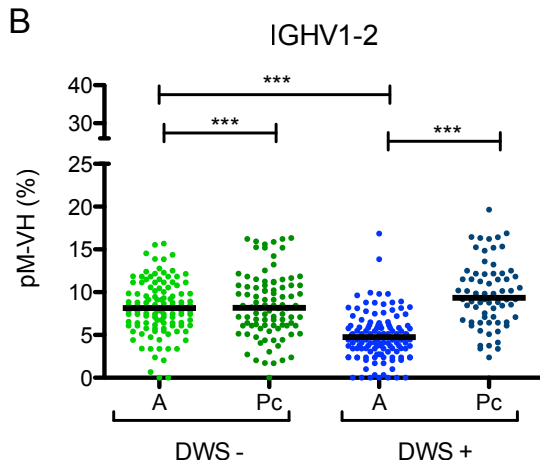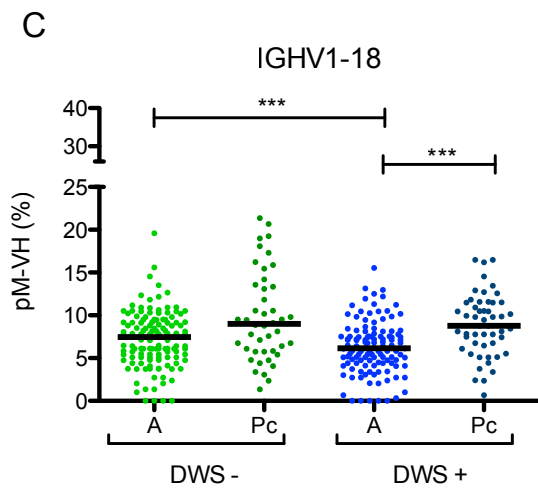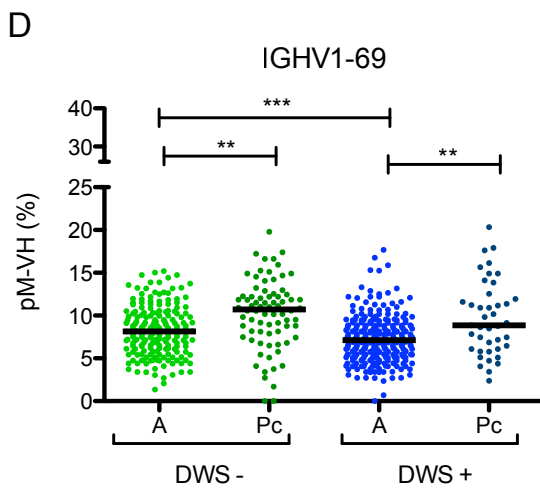

Supplement: 13073_2016_276_MOESM12_ESM.pdf [file 13073_2016_276_MOESM12_ESM.pdf]
