# Supplementary material for: Lower IgG somatic hypermutation rates during acute dengue virus infection is compatible with a germinal center-independent B cell response
Source: PubMed Central journal article supplement (PMC4766701; doi:10.1186/s13073-016-0276-1), 2016-02-25

■ DWS - A  
 ■ DWS - Pc  
 ■ DWS + A  
 ■ DWS + Pc  
 ■ Primary  
 ■ Secondary  
 ■ Healthy Control

\*\*\*

Clinical Status  
Immune Status

i17 i20 i25 i03 i04 i07 i13 i15 i27 i28 i01 i05 i08 i10 i18 i21 i22 i23 i29 i17 i20 i25 i03 i07 i27 i28 i01 i08 i10 i18 c06 c07 c08 c09 c10 c11 c12 c13 c14 c15

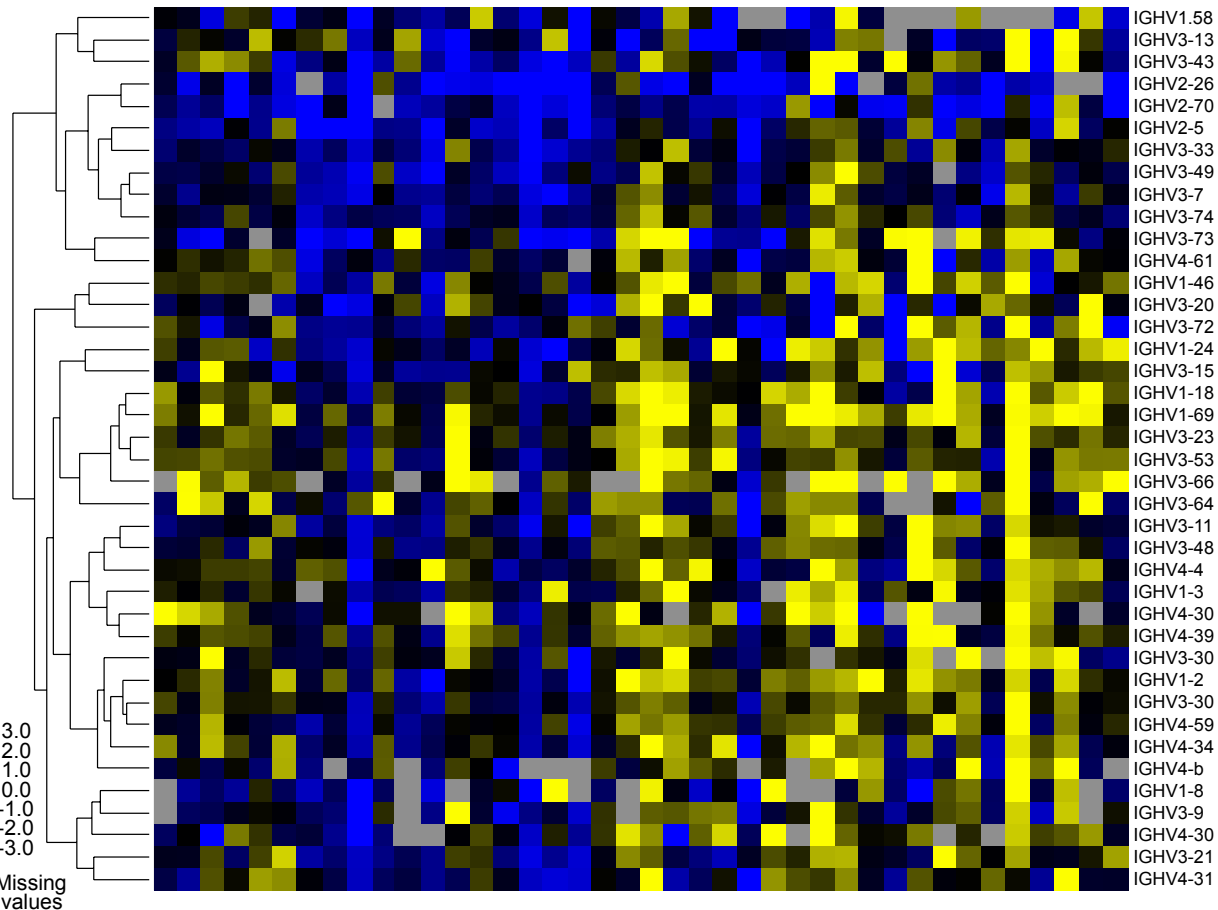

Supplement: 13073_2016_276_MOESM14_ESM.pdf [file 13073_2016_276_MOESM14_ESM.pdf]
